# Supplementary material for: Novel lanthanide coordination polymers based on bis-tridentate chelator pyrazine-2,3,5,6-tetracarboxylate with nano-channels and water clusters
Source: Royal Society of Chemistry journal article supplement (doi:10.1039/b900618d), 2009-01-01
Supplement: b900618d.pdf [file b900618d.pdf]

## SUPPORTING INFORMATIONS

### Synthesis and Crystal Structure of Lanthanide Coordination Polymers with Nano-channels and Water Clusters

Ying-Ping Quan<sup>1</sup>, Li-Hua Zhao<sup>1</sup>, Ai-Hong Yang<sup>1</sup>, Jian-Zhong Cui<sup>1\*</sup>, Hong-Ling Gao<sup>1</sup>, Fan-Li Lu<sup>1</sup>,  
Wei Shi<sup>a</sup>, Peng Cheng<sup>a\*</sup>

<sup>1</sup> Department of Chemistry, Tianjin University, Tianjin 300072, P. R. China

<sup>a</sup> Department of Chemistry, Nankai University, Tianjin 300071, P. R. China

\*Author to whom correspondence should be addressed. Email: [cuijianzhong@tju.edu.cn](mailto:cuijianzhong@tju.edu.cn)

- S1. Selected bond lengths (Å) and angles (°) for [Lu<sub>2</sub>(pztc)<sub>1.5</sub>(H<sub>2</sub>O)<sub>6</sub>]<sup>+</sup>·7.5H<sub>2</sub>O (**2**)  
S2. Selected bond lengths (Å) and angles (°) for [Er<sub>2</sub>(pztc)<sub>1.5</sub>(H<sub>2</sub>O)<sub>6</sub>]<sup>+</sup>·7H<sub>2</sub>O (**3**)  
S3. IR spectrum of complex [Yb<sub>2</sub>(pztc)<sub>1.5</sub>(H<sub>2</sub>O)<sub>6</sub>]<sup>+</sup>·7H<sub>2</sub>O (**1**)  
S4. IR spectrum of complex [[Lu<sub>2</sub>(pztc)<sub>1.5</sub>(H<sub>2</sub>O)<sub>6</sub>]<sup>+</sup>·7.5H<sub>2</sub>O (**2**)  
S5. IR spectrum of complex [Er<sub>2</sub>(pztc)<sub>1.5</sub>(H<sub>2</sub>O)<sub>6</sub>]<sup>+</sup>·7H<sub>2</sub>O (**3**)  
S6 TG curve of the complex **1**

#### S1 Selected Bond Lengths (Å) and Angles (°) for [Lu<sub>2</sub>(pztc)<sub>1.5</sub>(H<sub>2</sub>O)<sub>6</sub>]<sup>+</sup>·7.5H<sub>2</sub>O

|                      |           |                      |           |
|----------------------|-----------|----------------------|-----------|
| Lu(1)-O(1)           | 2.287(10) | Lu(1)-O(4)#1         | 2.312(10) |
| Lu(1)-O(12)#2        | 2.324(11) | Lu(1)-O(5)#1         | 2.353(10) |
| Lu(1)-O(9)           | 2.360(10) | Lu(1)-O(8)           | 2.370(10) |
| Lu(1)-N(2)#1         | 2.479(11) | Lu(1)-N(3)           | 2.503(12) |
| Lu(1)-N(1)           | 2.507(11) | Lu(2)-O(16)          | 2.295(10) |
| Lu(2)-O(17)          | 2.299(11) | Lu(2)-O(14)          | 2.323(10) |
| Lu(2)-O(13)          | 2.325(9)  | Lu(2)-O(15)          | 2.338(12) |
| Lu(2)-O(7)           | 2.344(11) | Lu(2)-O(11)#3        | 2.348(10) |
| Lu(2)-O(18)          | 2.355(12) |                      |           |
| O(1)-Lu(1)-O(4)#1    | 82.6(4)   | O(1)-Lu(1)-O(12)#2   | 77.8(3)   |
| O(4)#1-Lu(1)-O(12)#2 | 78.4(4)   | O(1)-Lu(1)-O(5)#1    | 82.5(4)   |
| O(4)#1-Lu(1)-O(5)#1  | 129.9(3)  | O(12)#2-Lu(1)-O(5)#1 | 142.8(4)  |
| O(1)-Lu(1)-O(9)      | 145.3(3)  | O(4)#1-Lu(1)-O(9)    | 84.0(4)   |
| O(12)#2-Lu(1)-O(9)   | 130.1(4)  | O(5)#1-Lu(1)-O(9)    | 82.0(4)   |
| O(1)-Lu(1)-O(8)      | 129.9(3)  | O(4)#1-Lu(1)-O(8)    | 140.8(4)  |
| O(12)#2-Lu(1)-O(8)   | 87.3(4)   | O(5)#1-Lu(1)-O(8)    | 81.6(4)   |
| O(9)-Lu(1)-O(8)      | 77.8(4)   | O(1)-Lu(1)-N(2)#1    | 74.2(4)   |

|                     |          |                      |          |
|---------------------|----------|----------------------|----------|
| O(4)#1-Lu(1)-N(2)#1 | 64.7(4)  | O(12)#2-Lu(1)-N(2)#1 | 135.8(4) |
| O(5)#1-Lu(1)-N(2)#1 | 65.2(4)  | O(9)-Lu(1)-N(2)#1    | 71.1(4)  |
| O(8)-Lu(1)-N(2)#1   | 136.8(4) | O(1)-Lu(1)-N(3)      | 137.5(4) |
| O(4)#1-Lu(1)-N(3)   | 71.7(4)  | O(12)#2-Lu(1)-N(3)   | 64.4(4)  |
| O(5)#1-Lu(1)-N(3)   | 139.9(4) | O(9)-Lu(1)-N(3)      | 65.7(4)  |
| O(8)-Lu(1)-N(3)     | 69.2(4)  | N(2)#1-Lu(1)-N(3)    | 120.5(4) |
| O(1)-Lu(1)-N(1)     | 65.5(4)  | O(4)#1-Lu(1)-N(1)    | 138.9(4) |
| O(12)#2-Lu(1)-N(1)  | 70.3(4)  | O(5)#1-Lu(1)-N(1)    | 72.9(4)  |
| O(9)-Lu(1)-N(1)     | 136.8(4) | O(8)-Lu(1)-N(1)      | 64.4(4)  |
| N(2)#1-Lu(1)-N(1)   | 124.5(4) | N(3)-Lu(1)-N(1)      | 115.0(3) |
| O(16)-Lu(2)-O(17)   | 78.6(4)  | O(16)-Lu(2)-O(14)    | 115.6(4) |
| O(17)-Lu(2)-O(14)   | 142.7(4) | O(16)-Lu(2)-O(13)    | 141.7(4) |
| O(17)-Lu(2)-O(13)   | 112.6(4) | O(14)-Lu(2)-O(13)    | 78.4(4)  |
| O(16)-Lu(2)-O(15)   | 78.0(4)  | O(17)-Lu(2)-O(15)    | 77.2(4)  |
| O(14)-Lu(2)-O(15)   | 72.9(4)  | O(13)-Lu(2)-O(15)    | 139.2(4) |
| O(16)-Lu(2)-O(7)    | 143.1(4) | O(17)-Lu(2)-O(7)     | 70.7(4)  |
| O(14)-Lu(2)-O(7)    | 80.5(4)  | O(13)-Lu(2)-O(7)     | 71.4(4)  |
| O(15)-Lu(2)-O(7)    | 75.7(4)  | O(16)-Lu(2)-O(11)#3  | 70.8(4)  |
| O(17)-Lu(2)-O(11)#3 | 140.9(4) | O(14)-Lu(2)-O(11)#3  | 74.5(4)  |
| O(13)-Lu(2)-O(11)#3 | 80.2(4)  | O(15)-Lu(2)-O(11)#3  | 117.9(4) |
| O(7)-Lu(2)-O(11)#3  | 145.3(3) | O(16)-Lu(2)-O(18)    | 77.8(4)  |
| O(17)-Lu(2)-O(18)   | 73.0(5)  | O(14)-Lu(2)-O(18)    | 141.6(5) |
| O(13)-Lu(2)-O(18)   | 71.6(4)  | O(15)-Lu(2)-O(18)    | 144.6(4) |
| O(7)-Lu(2)-O(18)    | 110.9(4) | O(11)#3-Lu(2)-O(18)  | 77.2(4)  |

Symmetry code: #1 x, -y+3/2, z+1/2; #2 -x+2, -y+1, -z+2; #3 -x+1, -y+1, -z+2.

S2. Selected bond lengths (Å) and angles (°) for [Er<sub>2</sub>(pztc)<sub>1.5</sub>(H<sub>2</sub>O)<sub>6</sub>]-7H<sub>2</sub>O (3)

|                     |            |                    |            |
|---------------------|------------|--------------------|------------|
| Er(1)-O(12)         | 2.290(5)   | Er(1)-O(4)#1       | 2.328(4)   |
| Er(1)-O(5)#1        | 2.329(4)   | Er(1)-O(9)         | 2.344(4)   |
| Er(1)-O(1)          | 2.374(4)   | Er(1)-O(8)         | 2.374(4)   |
| Er(1)-N(2)#1        | 2.479(5)   | Er(1)-N(1)         | 2.500(5)   |
| Er(1)-N(3)          | 2.534(5)   | Er(2)-O(14)        | 2.295(5)   |
| Er(2)-O(17)         | 2.297(5)   | Er(2)-O(15)        | 2.305(5)   |
| Er(2)-O(2)          | 2.320(4)   | Er(2)-O(18)        | 2.327(5)   |
| Er(2)-O(13)         | 2.366(6)   | Er(2)-O(11)#2      | 2.397(4)   |
| Er(2)-O(16)         | 2.425(5)   |                    |            |
| O(12)-Er(1)-O(4)#1  | 141.33(16) | O(12)-Er(1)-O(5)#1 | 80.83(17)  |
| O(4)#1-Er(1)-O(5)#1 | 130.55(16) | O(12)-Er(1)-O(9)   | 128.73(16) |
| O(4)#1-Er(1)-O(9)   | 81.94(16)  | O(5)#1-Er(1)-O(9)  | 85.00(17)  |
| O(12)-Er(1)-O(1)    | 83.20(17)  | O(4)#1-Er(1)-O(1)  | 81.07(16)  |
| O(5)#1-Er(1)-O(1)   | 141.71(16) | O(9)-Er(1)-O(1)    | 78.34(16)  |
| O(12)-Er(1)-O(8)    | 78.90(16)  | O(4)#1-Er(1)-O(8)  | 84.47(16)  |

|                     |            |                     |            |
|---------------------|------------|---------------------|------------|
| O(5)#1-Er(1)-O(8)   | 80.64(16)  | O(9)-Er(1)-O(8)     | 146.19(15) |
| O(1)-Er(1)-O(8)     | 129.69(15) | O(12)-Er(1)-N(2)#1  | 138.38(17) |
| O(4)#1-Er(1)-N(2)#1 | 65.56(16)  | O(5)#1-Er(1)-N(2)#1 | 65.00(16)  |
| O(9)-Er(1)-N(2)#1   | 73.24(17)  | O(1)-Er(1)-N(2)#1   | 138.42(17) |
| O(8)-Er(1)-N(2)#1   | 72.95(16)  | O(12)-Er(1)-N(1)    | 68.91(17)  |
| O(4)#1-Er(1)-N(1)   | 72.42(17)  | O(5)#1-Er(1)-N(1)   | 137.26(17) |
| O(9)-Er(1)-N(1)     | 137.53(17) | O(1)-Er(1)-N(1)     | 64.88(16)  |
| O(8)-Er(1)-N(1)     | 64.81(16)  | N(2)#1-Er(1)-N(1)   | 122.06(17) |
| O(12)-Er(1)-N(3)    | 64.09(16)  | O(4)#1-Er(1)-N(3)   | 138.77(16) |
| O(5)#1-Er(1)-N(3)   | 72.18(16)  | O(9)-Er(1)-N(3)     | 64.65(16)  |
| O(1)-Er(1)-N(3)     | 69.53(15)  | O(8)-Er(1)-N(3)     | 136.62(16) |
| N(2)#1-Er(1)-N(3)   | 121.31(17) | N(1)-Er(1)-N(3)     | 116.62(16) |
| O(14)-Er(2)-O(17)   | 101.3(2)   | O(14)-Er(2)-O(15)   | 144.76(18) |
| O(17)-Er(2)-O(15)   | 91.44(18)  | O(14)-Er(2)-O(2)    | 77.77(18)  |
| O(17)-Er(2)-O(2)    | 140.11(16) | O(15)-Er(2)-O(2)    | 71.66(16)  |
| O(14)-Er(2)-O(18)   | 142.33(19) | O(17)-Er(2)-O(18)   | 82.9(2)    |
| O(15)-Er(2)-O(18)   | 71.37(18)  | O(2)-Er(2)-O(18)    | 122.27(18) |
| O(14)-Er(2)-O(13)   | 78.0(2)    | O(17)-Er(2)-O(13)   | 145.40(19) |
| O(15)-Er(2)-O(13)   | 109.2(2)   | O(2)-Er(2)-O(13)    | 74.13(18)  |
| O(18)-Er(2)-O(13)   | 78.1(2)    | O(14)-Er(2)-O(11)#2 | 78.01(17)  |
| O(17)-Er(2)-O(11)#2 | 74.87(17)  | O(15)-Er(2)-O(11)#2 | 137.23(16) |
| O(2)-Er(2)-O(11)#2  | 140.93(15) | O(18)-Er(2)-O(11)#2 | 66.88(16)  |
| O(13)-Er(2)-O(11)#2 | 71.14(18)  | O(14)-Er(2)-O(16)   | 75.7(2)    |
| O(17)-Er(2)-O(16)   | 69.59(17)  | O(15)-Er(2)-O(16)   | 78.37(19)  |
| O(2)-Er(2)-O(16)    | 71.67(17)  | O(18)-Er(2)-O(16)   | 138.24(19) |
| O(13)-Er(2)-O(16)   | 140.31(19) | O(11)#2-Er(2)-O(16) | 129.89(1)  |

Symmetry code: #1 x,-y+1/2,z-1/2; #2 x+1,y,z

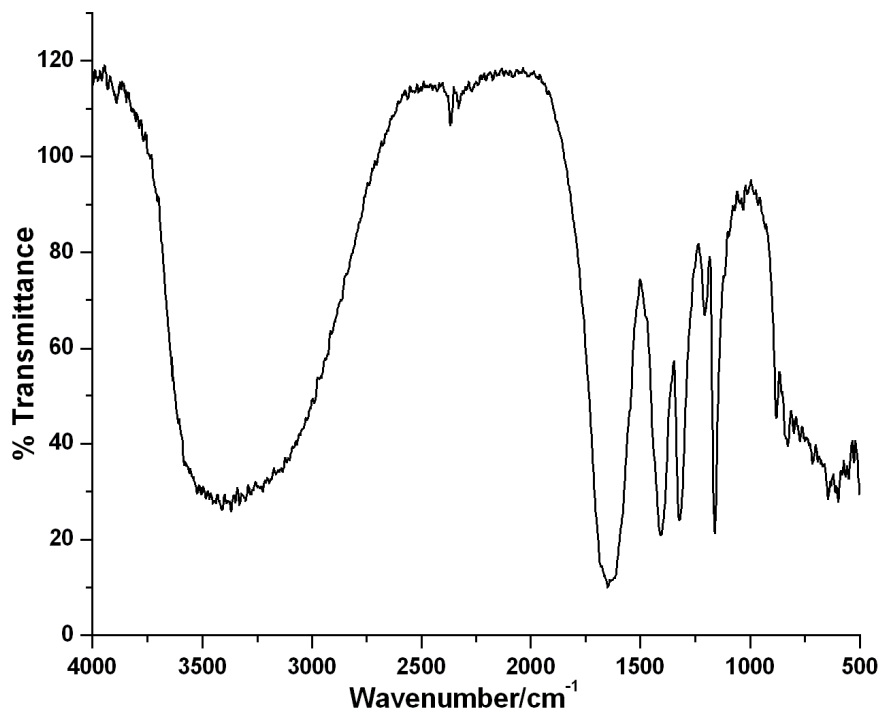

S3. IR spectrum of complex  $[\text{Yb}_2(\text{pztc})_{1.5}(\text{H}_2\text{O})_6] \cdot 7\text{H}_2\text{O}$  (**1**)

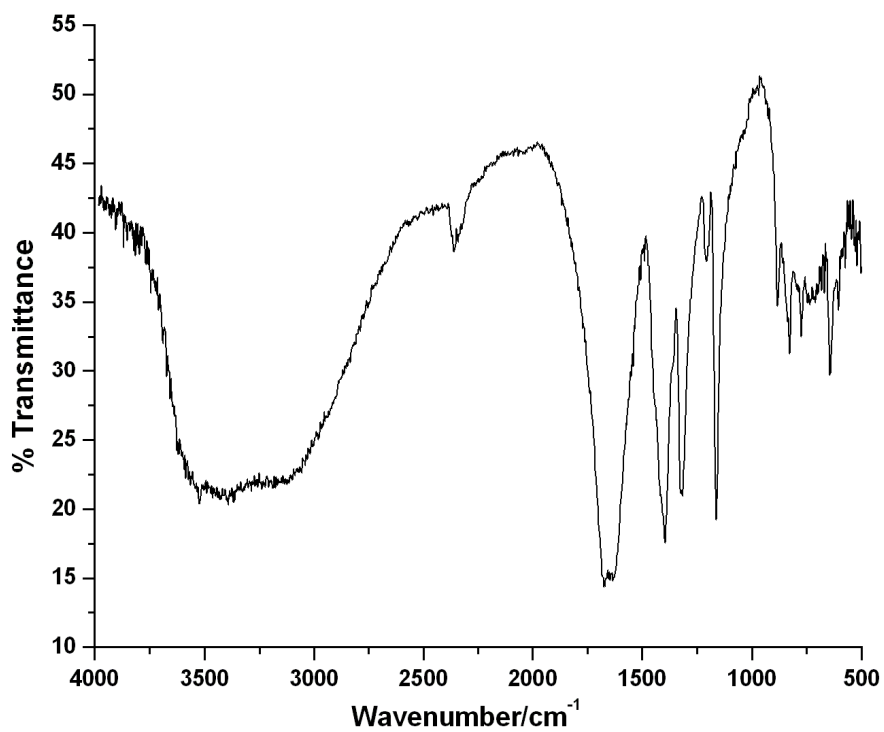

S4. IR spectrum of complex  $[[\text{Lu}_2(\text{pztc})_{1.5}(\text{H}_2\text{O})_6] \cdot 7.5\text{H}_2\text{O}$  (**2**)

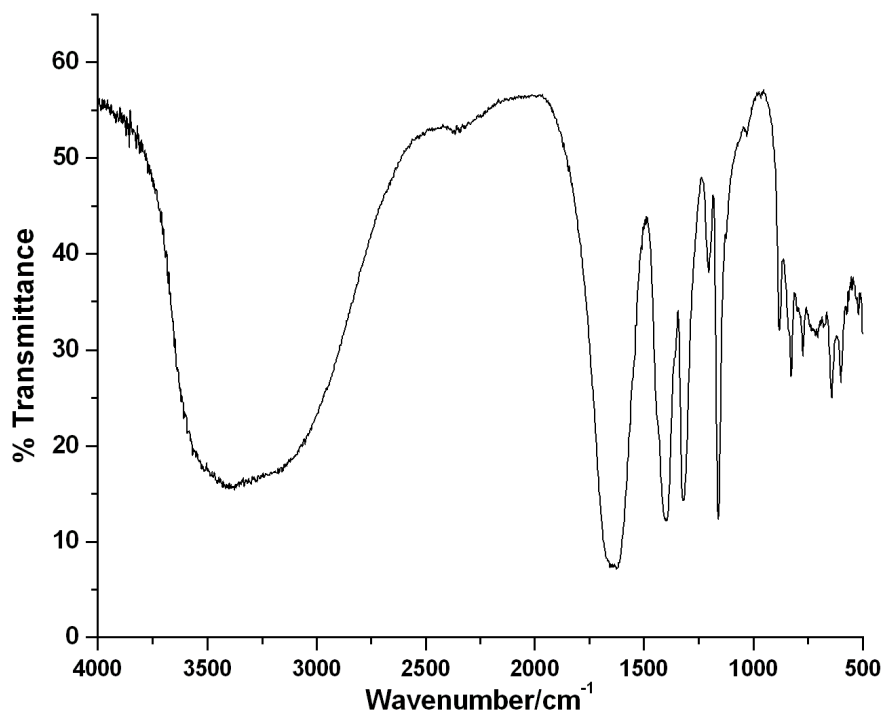

S5. IR spectrum of complex  $[\text{Er}_2(\text{pztc})_{1.5}(\text{H}_2\text{O})_6] \cdot 7\text{H}_2\text{O}$  (**3**)

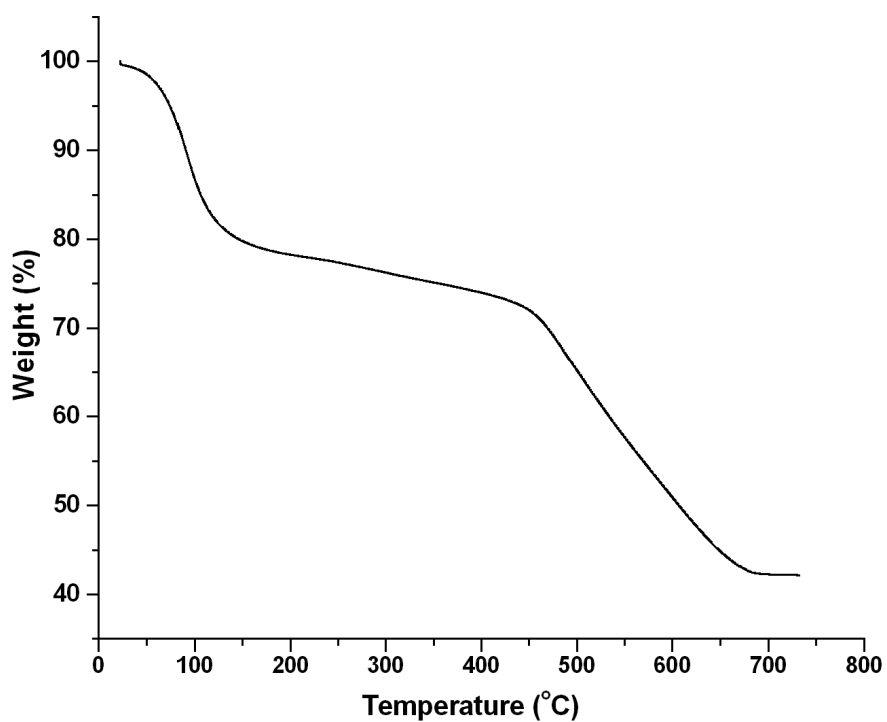

S6 TG curve of the complex **1**
